# Supplementary material for: Ensemble Modeling of the Likely Public Health Impact of a Pre-Erythrocytic Malaria Vaccine
Source: PLoS Med. 2012 Jan 17;9(1):e1001157. doi: 10.1371/journal.pmed.1001157 (PMC3260300; doi:10.1371/journal.pmed.1001157)

# X1: Age patterns of prevalence of infection

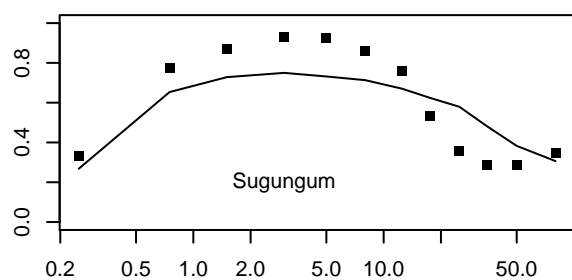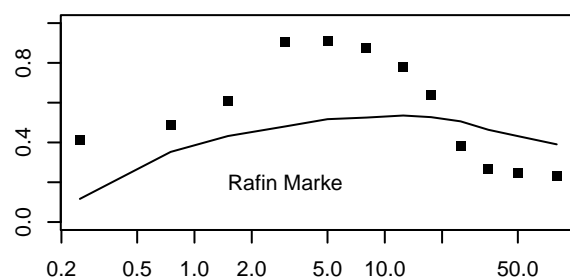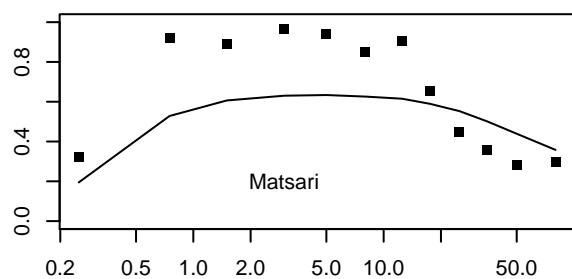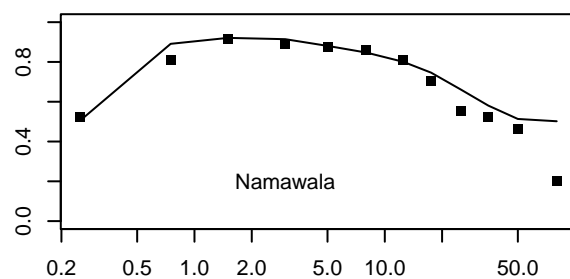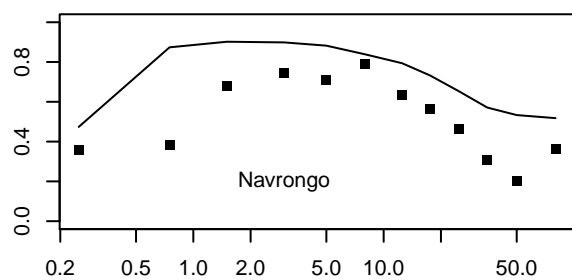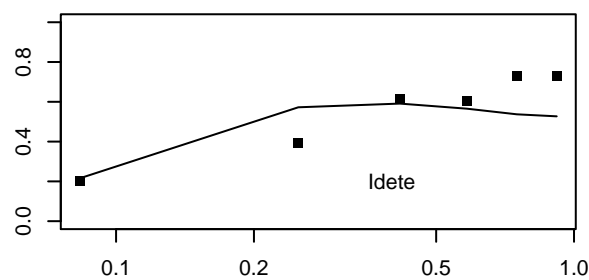

**X2: Age patterns of parasite density**

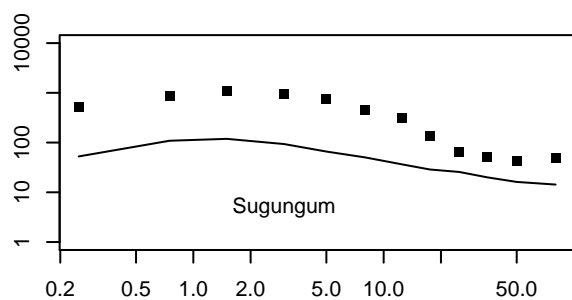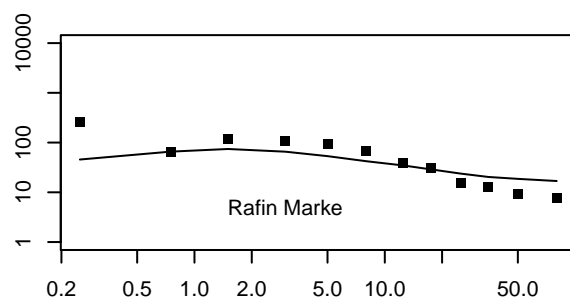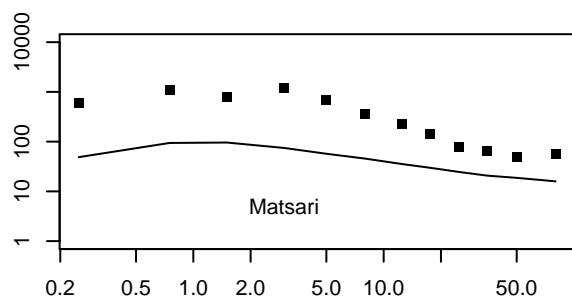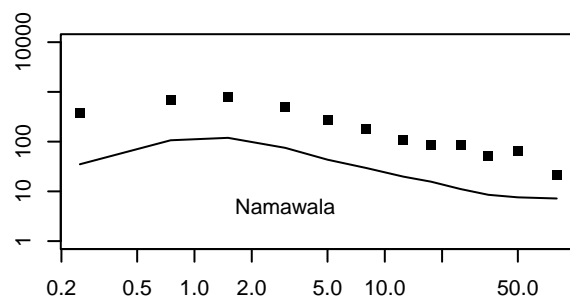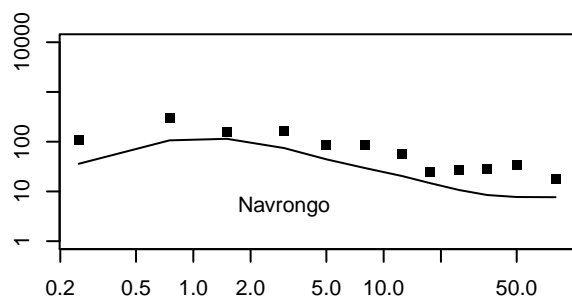

**density**

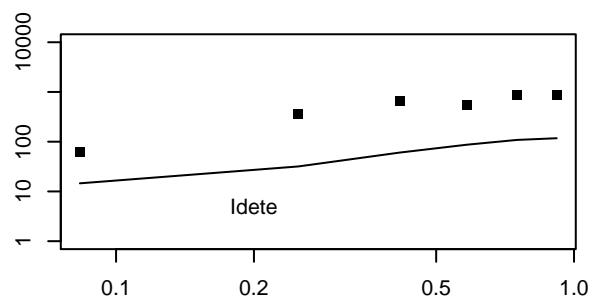

**X3: Age pattern of number of concurrent infections**

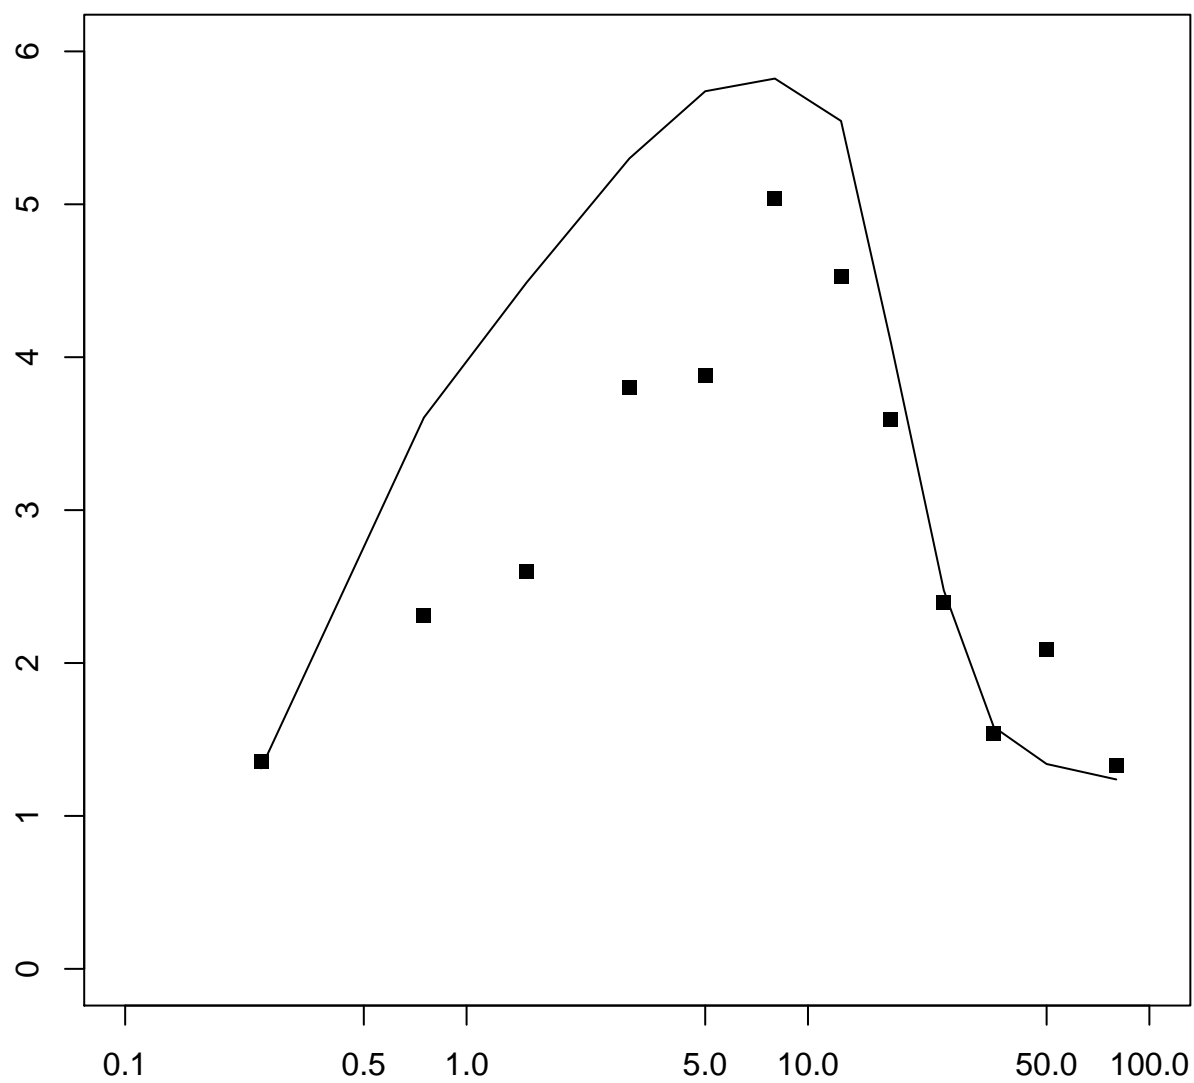

**X4a: Age pattern of incidence of clinical malaria**

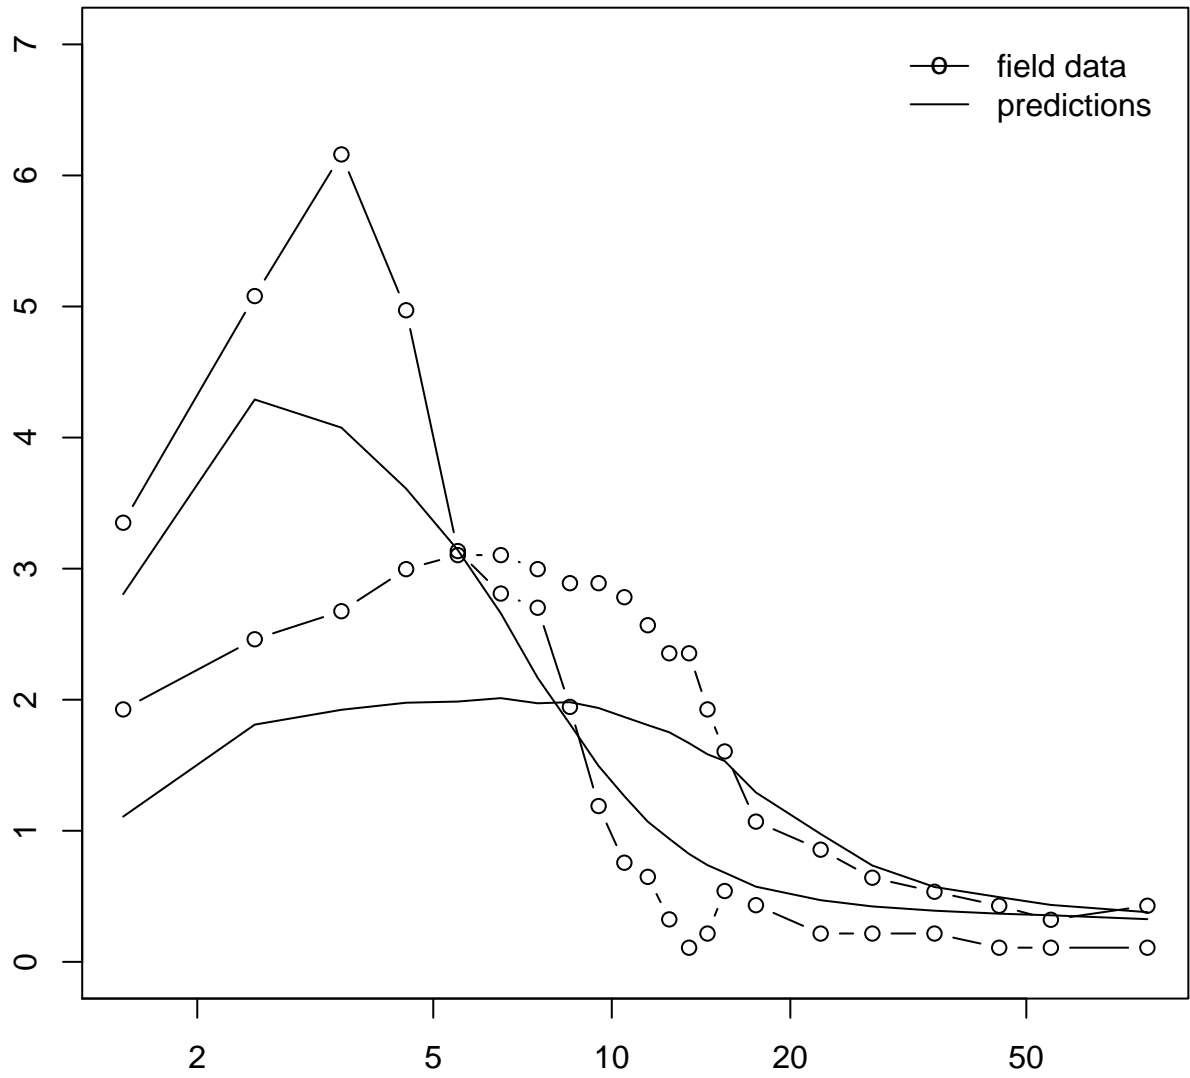

**X4b: Age pattern of incidence of clinical malaria**

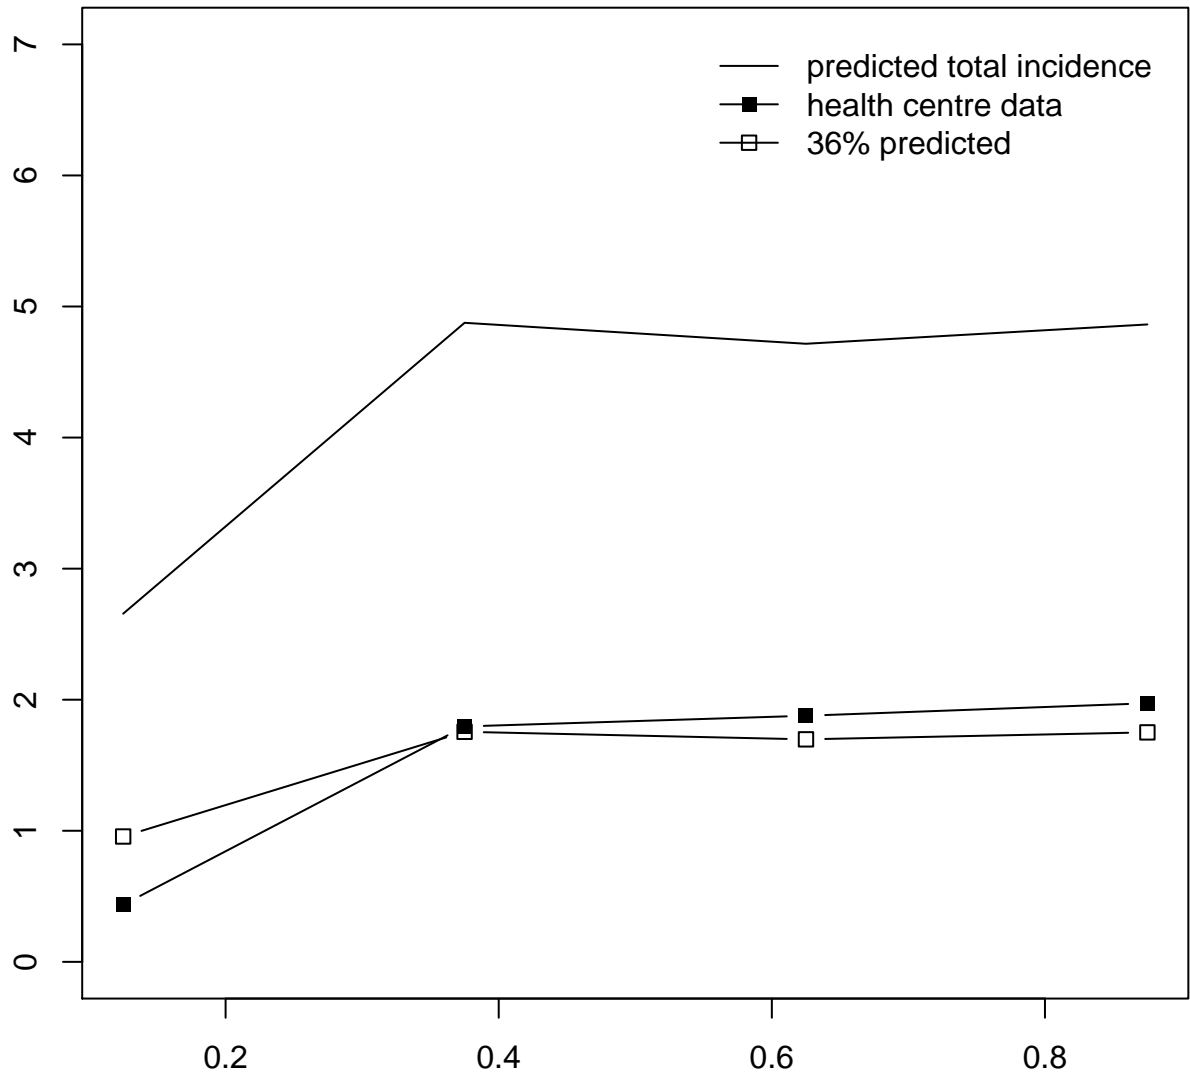

### X5: Age pattern of threshold parasite density for clinical attacks

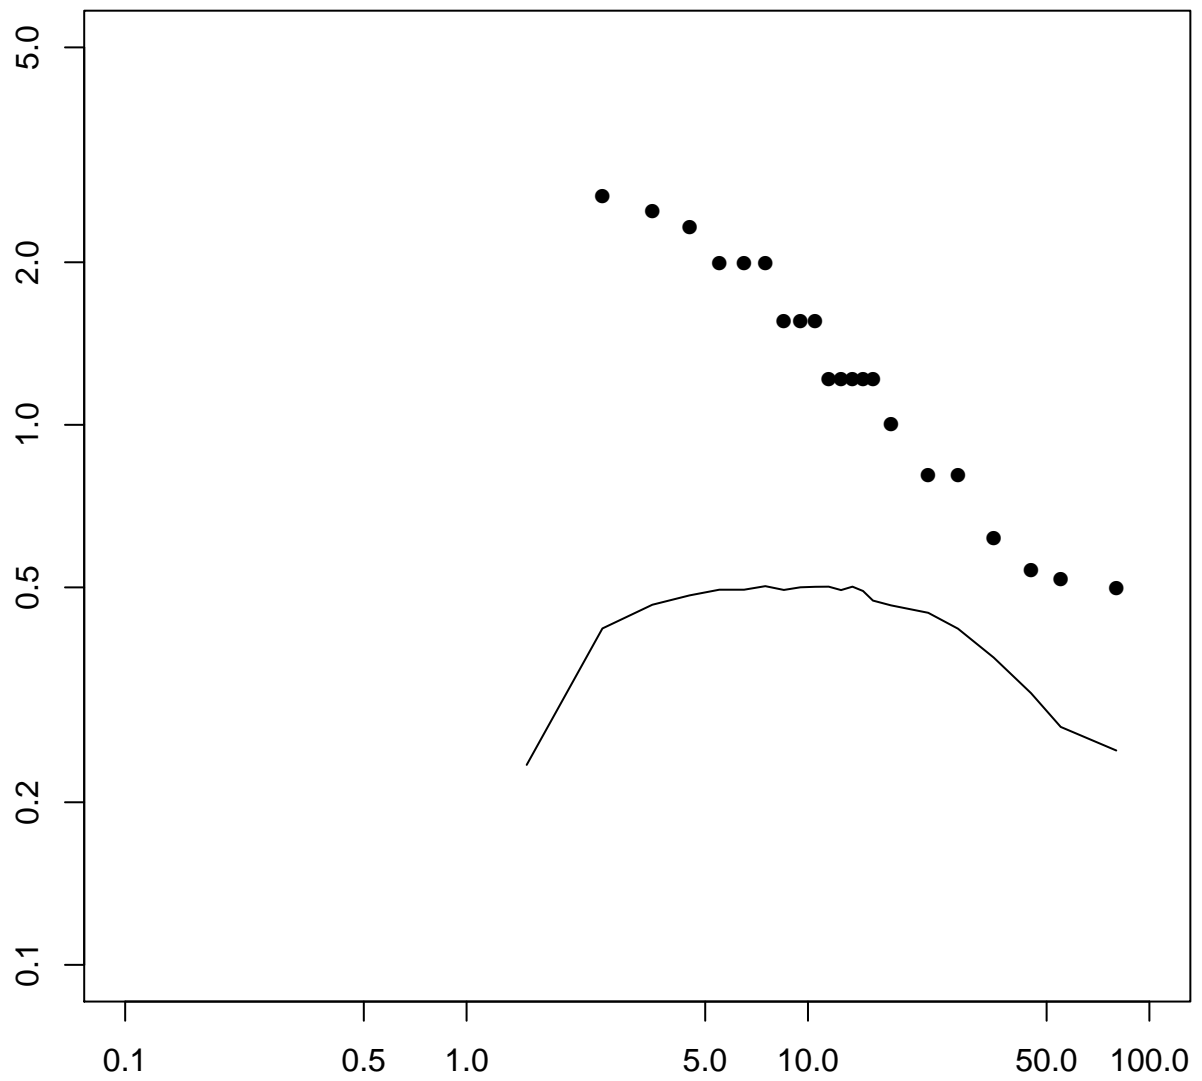

### X6: Hospitalisation rate in relation to prevalence in children

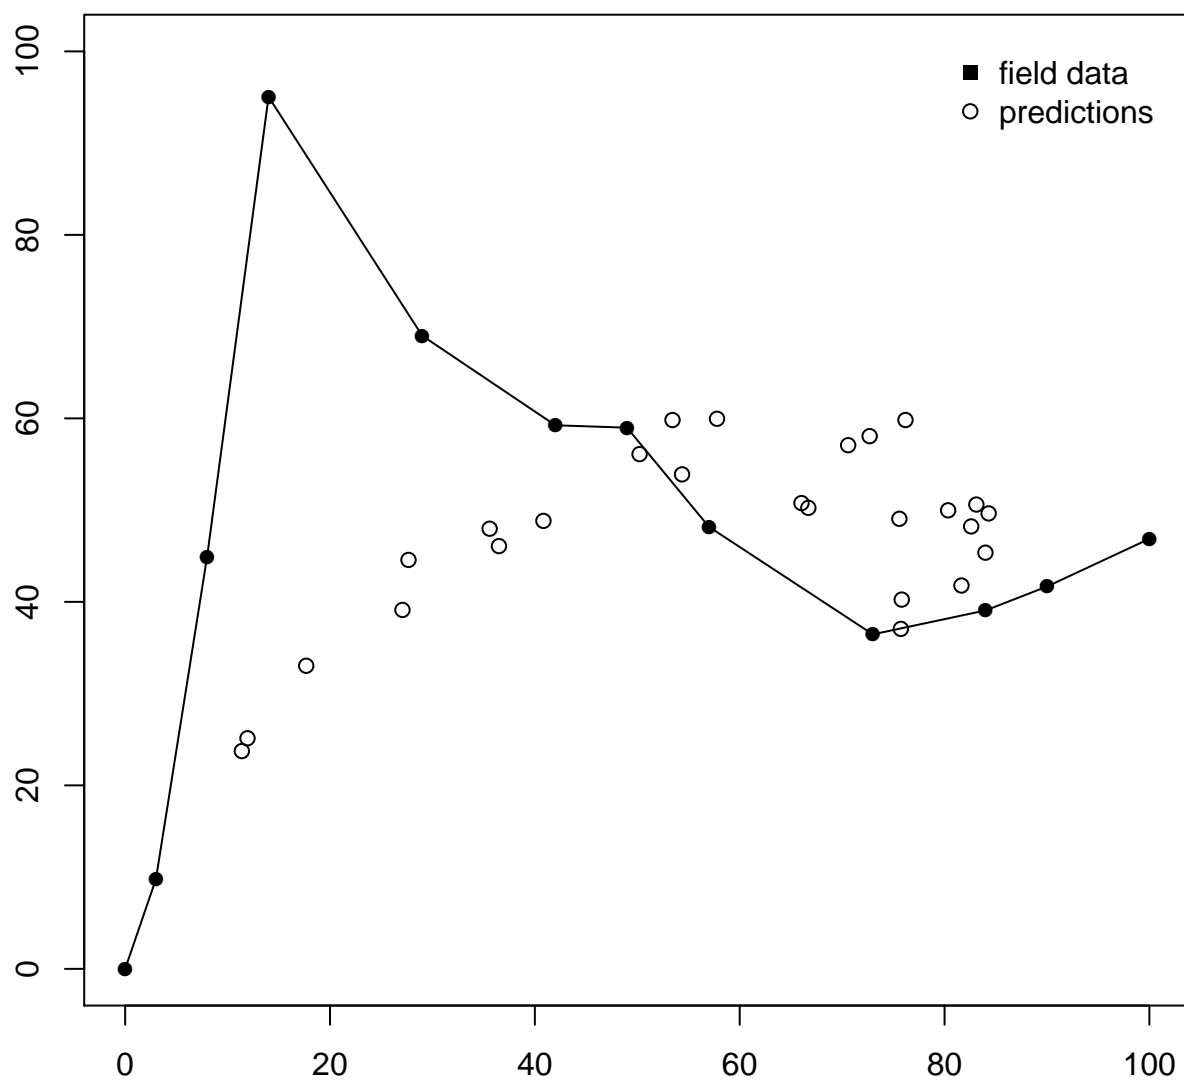

**X7a: Age pattern of hospitalisation**

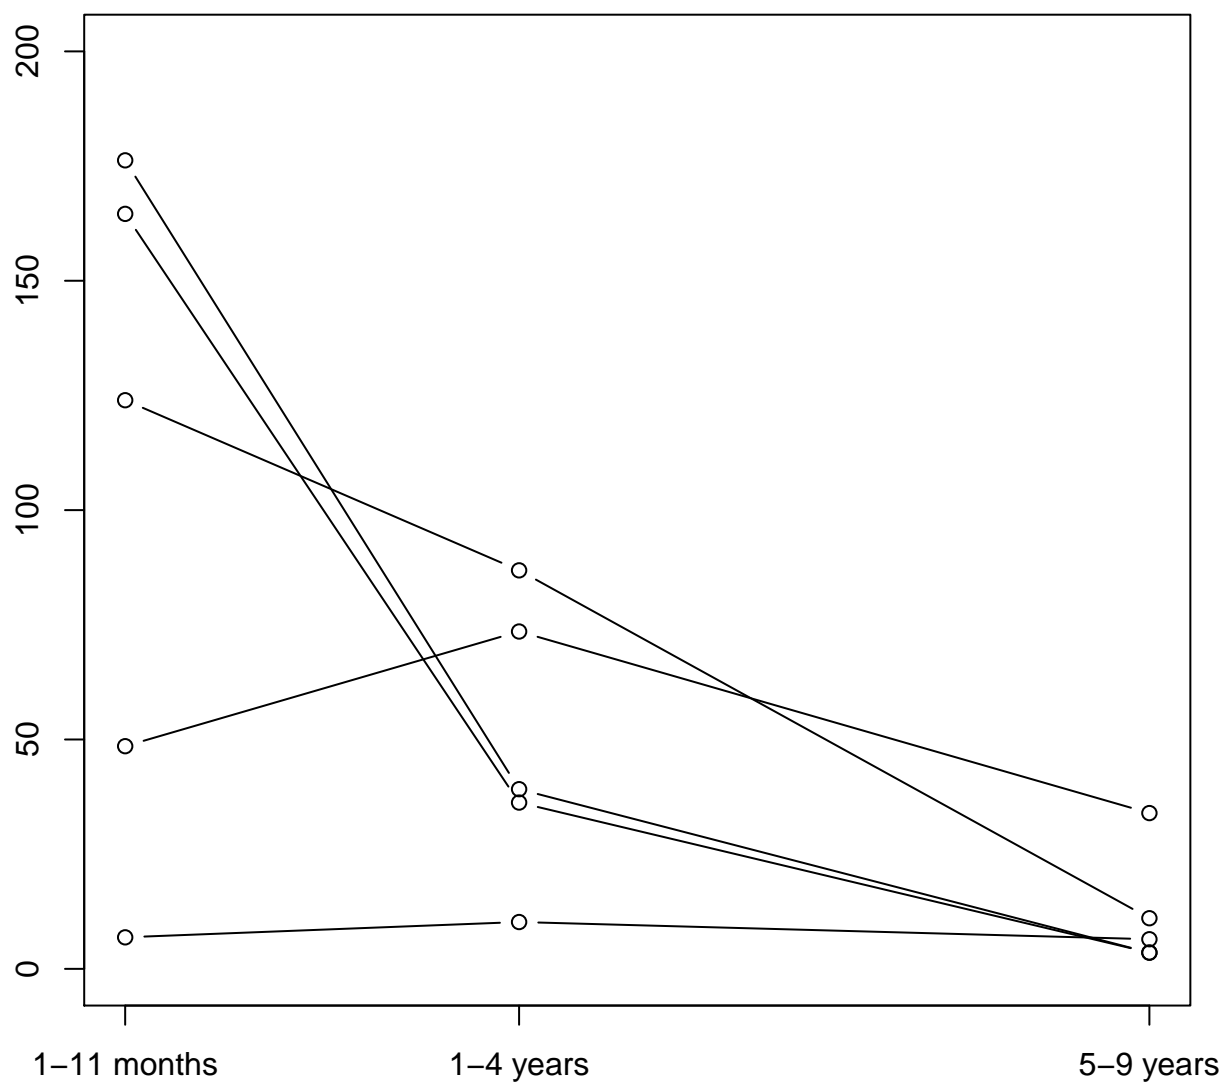

**X7b: Age pattern of hospitalisation**

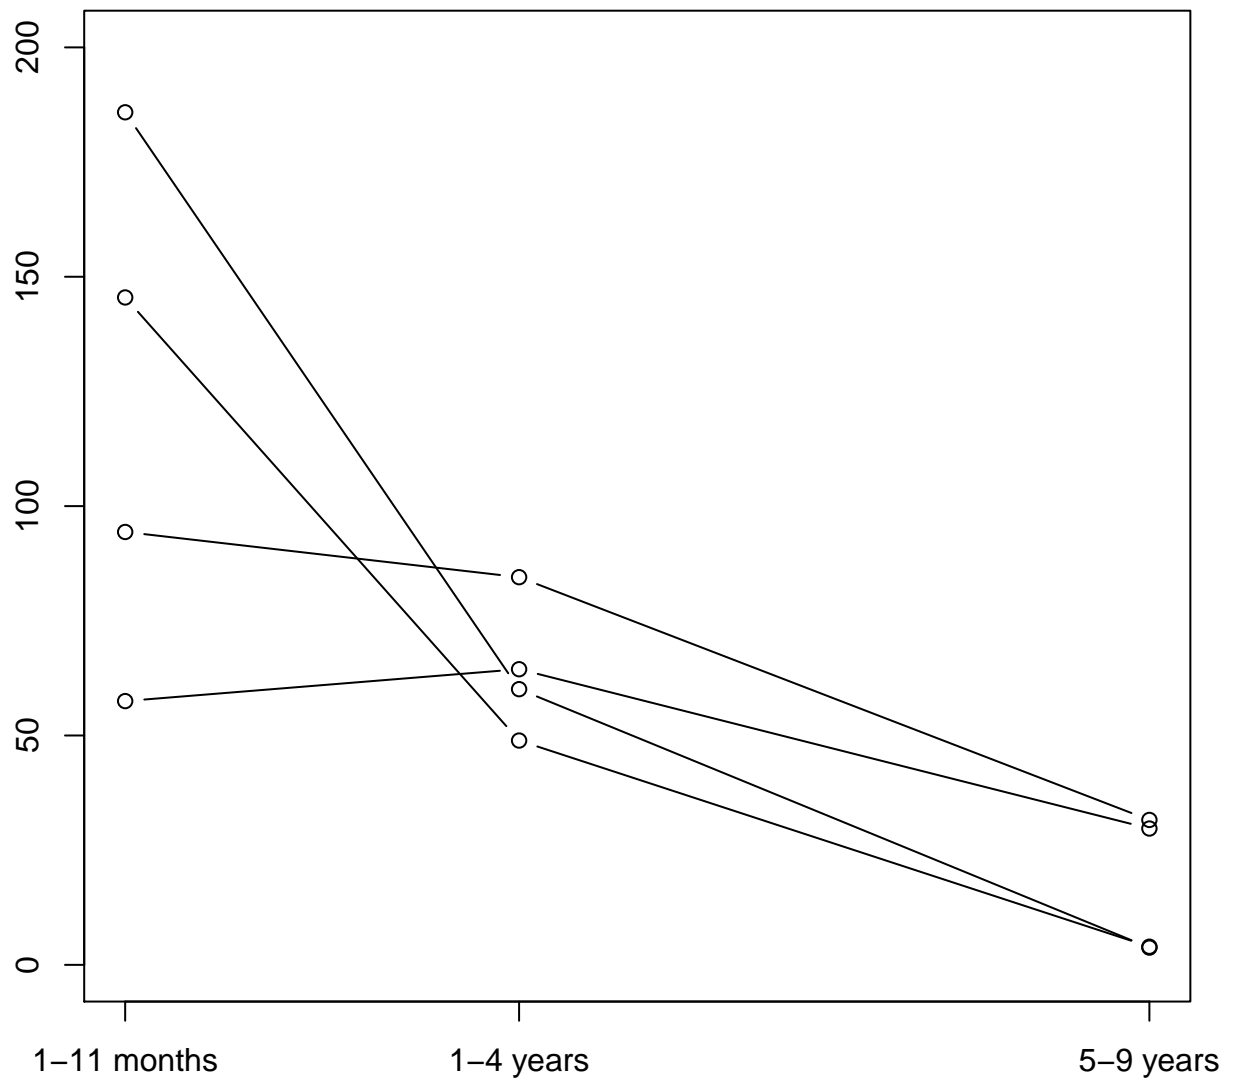

### X8: Malaria specific mortality in children

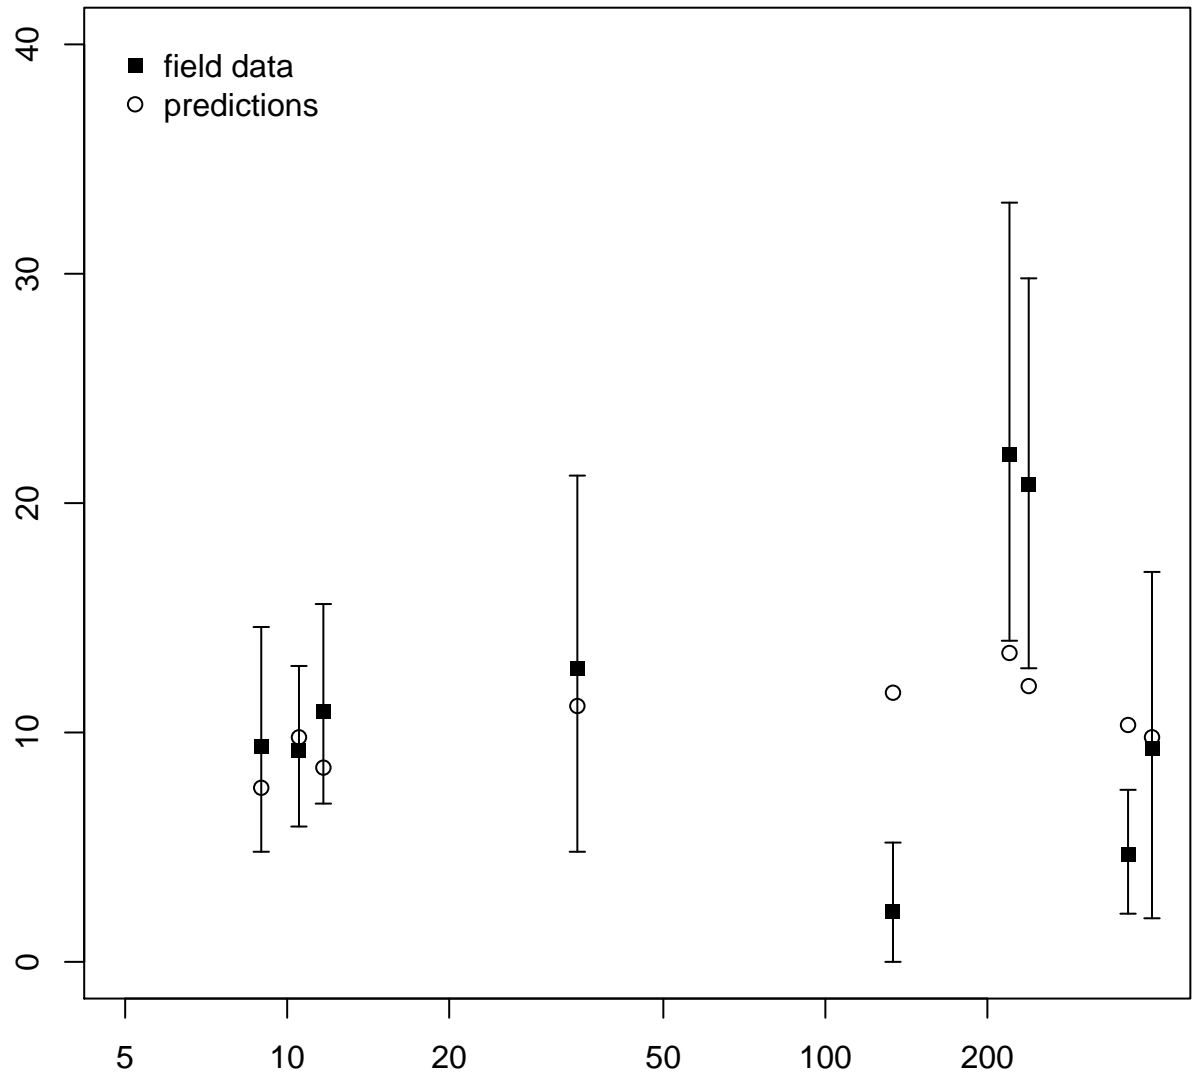

### X9: Infant mortality rate

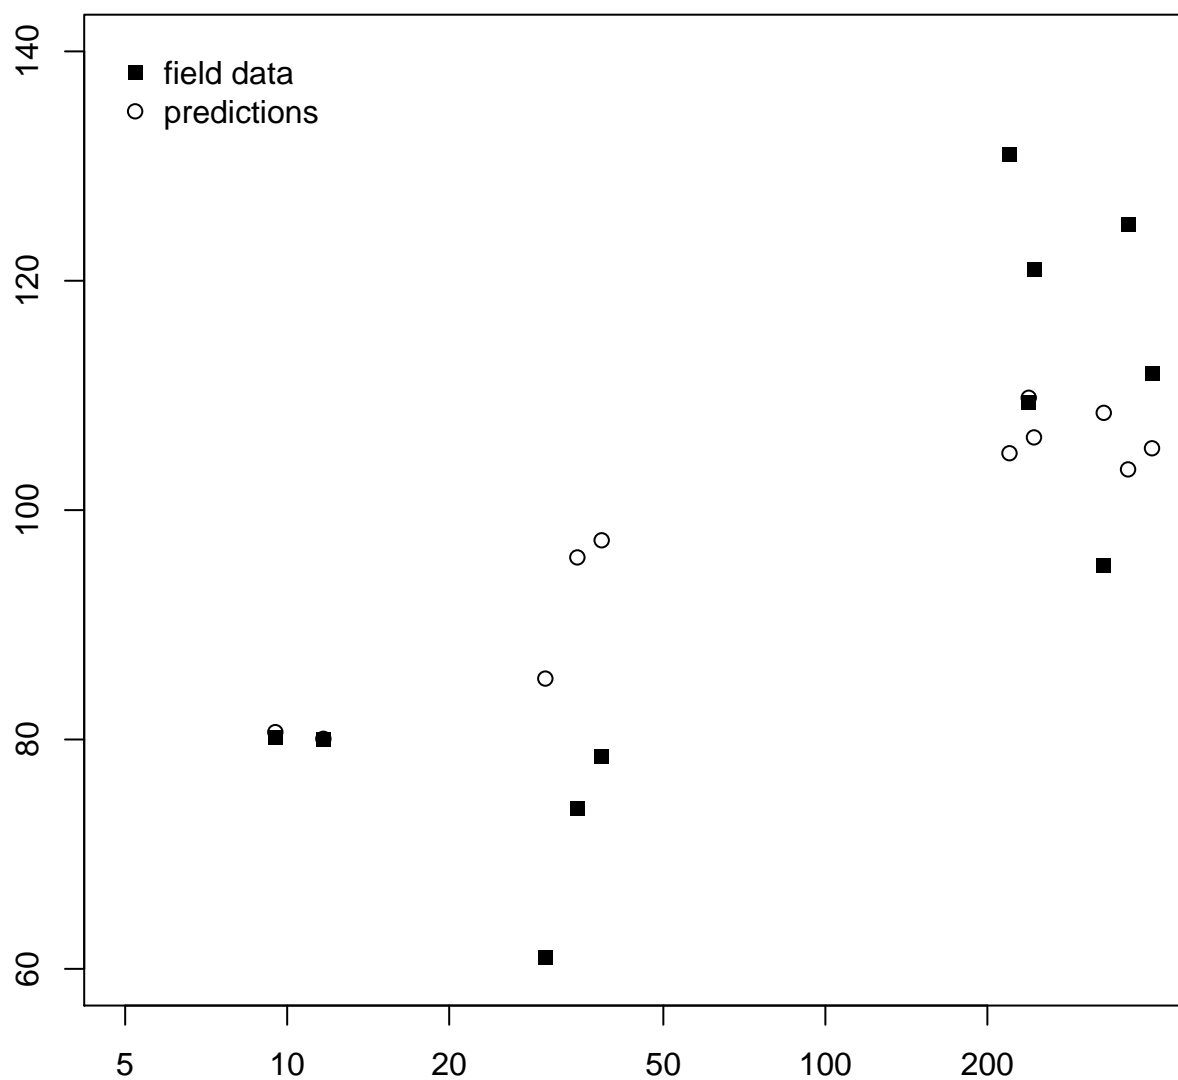

Supplement: Text S13 — Plots of model fit to field data: R0674. (PDF) [file pmed.1001157.s021.pdf]
