# Supplementary material for: Ensemble Modeling of the Likely Public Health Impact of a Pre-Erythrocytic Malaria Vaccine
Source: PubMed Central journal article supplement (PMC3260300; doi:10.1371/journal.pmed.1001157), 2012-01-17

**X1: Age patterns of prevalence of infection**

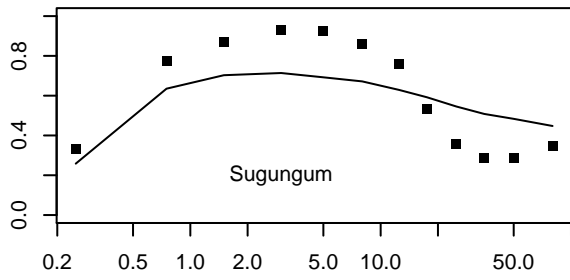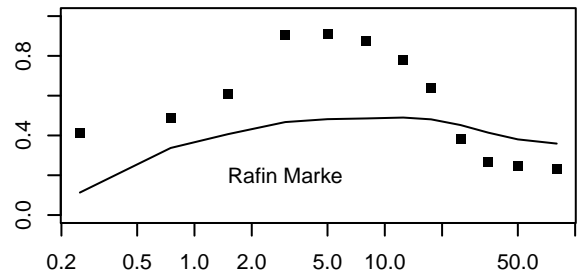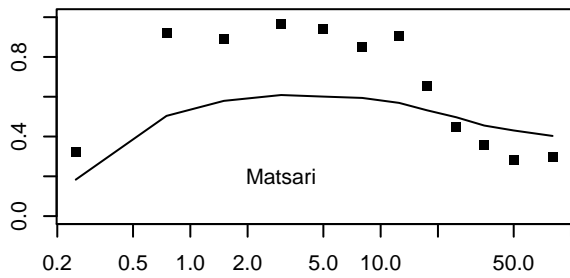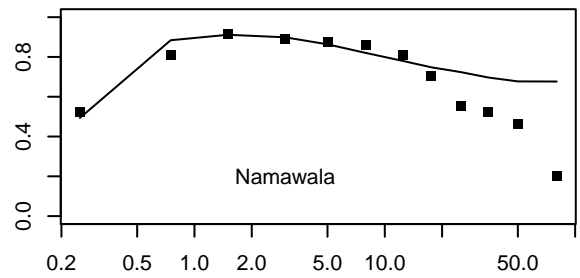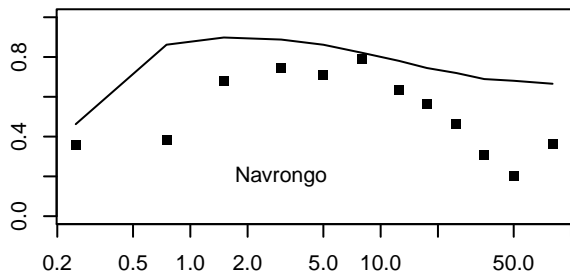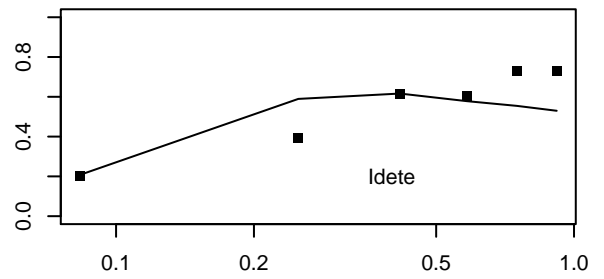

## X2: Age patterns of parasite density

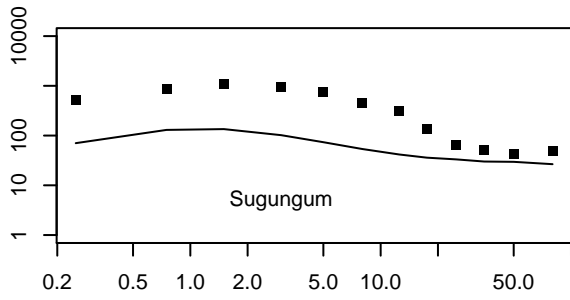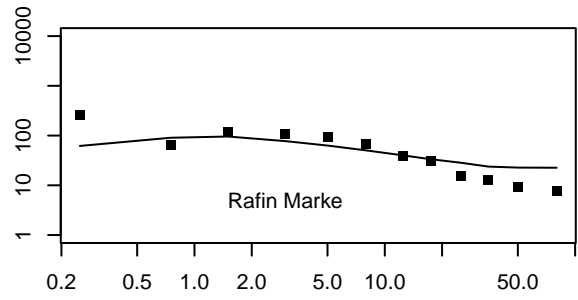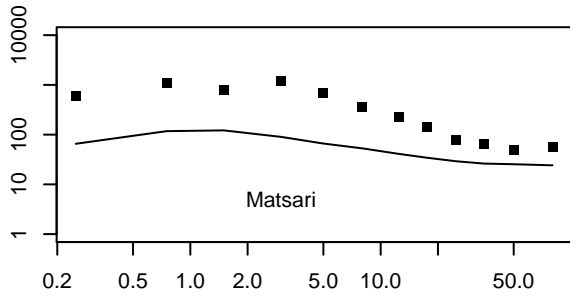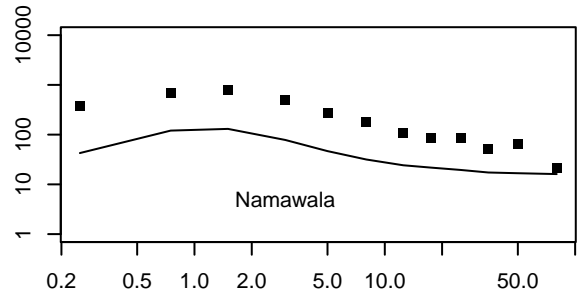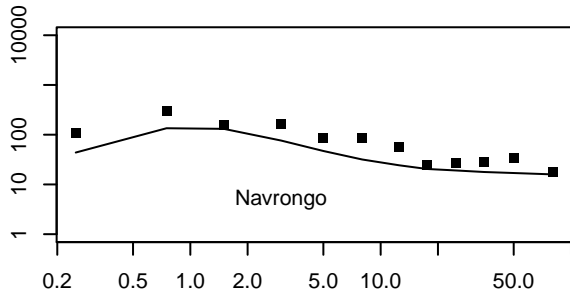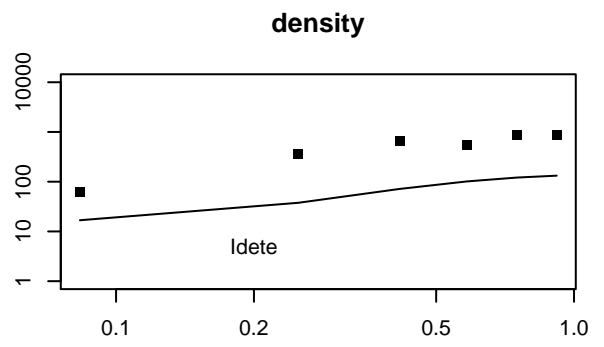

### X3: Age pattern of number of concurrent infections

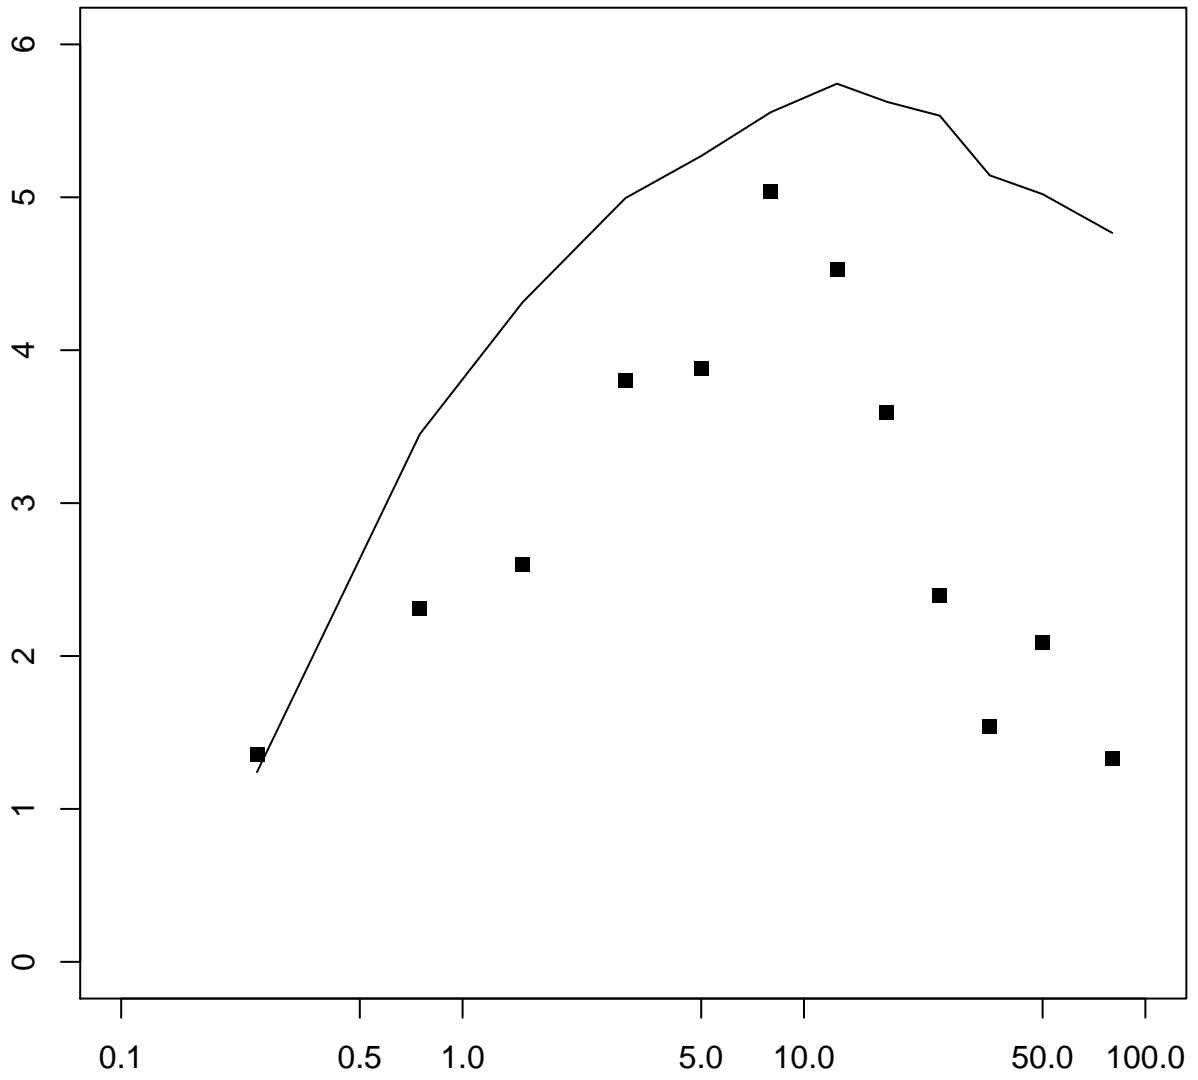

**X4a: Age pattern of incidence of clinical malaria**

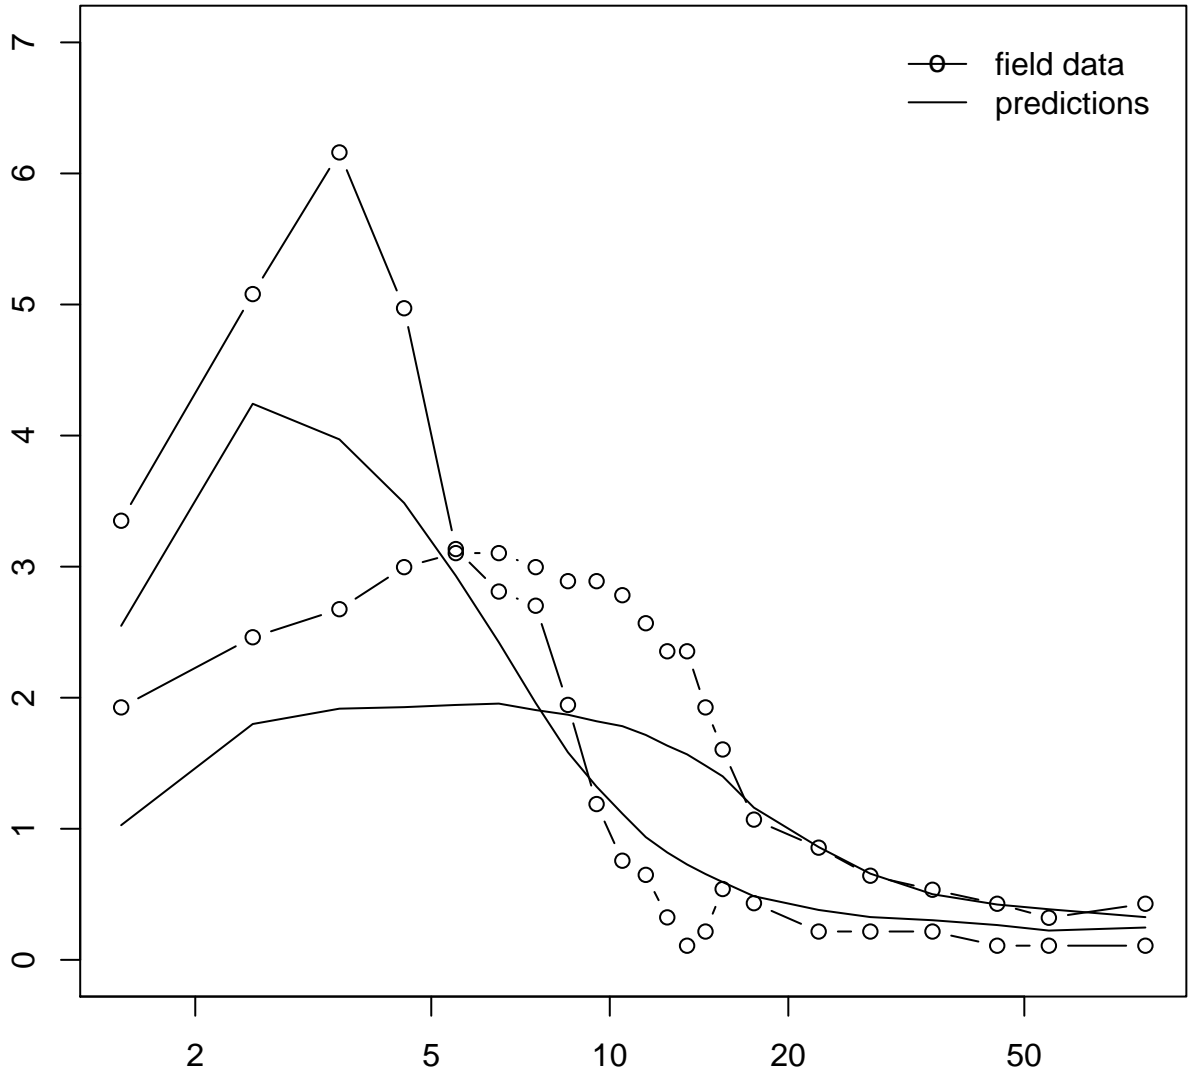

### X4b: Age pattern of incidence of clinical malaria

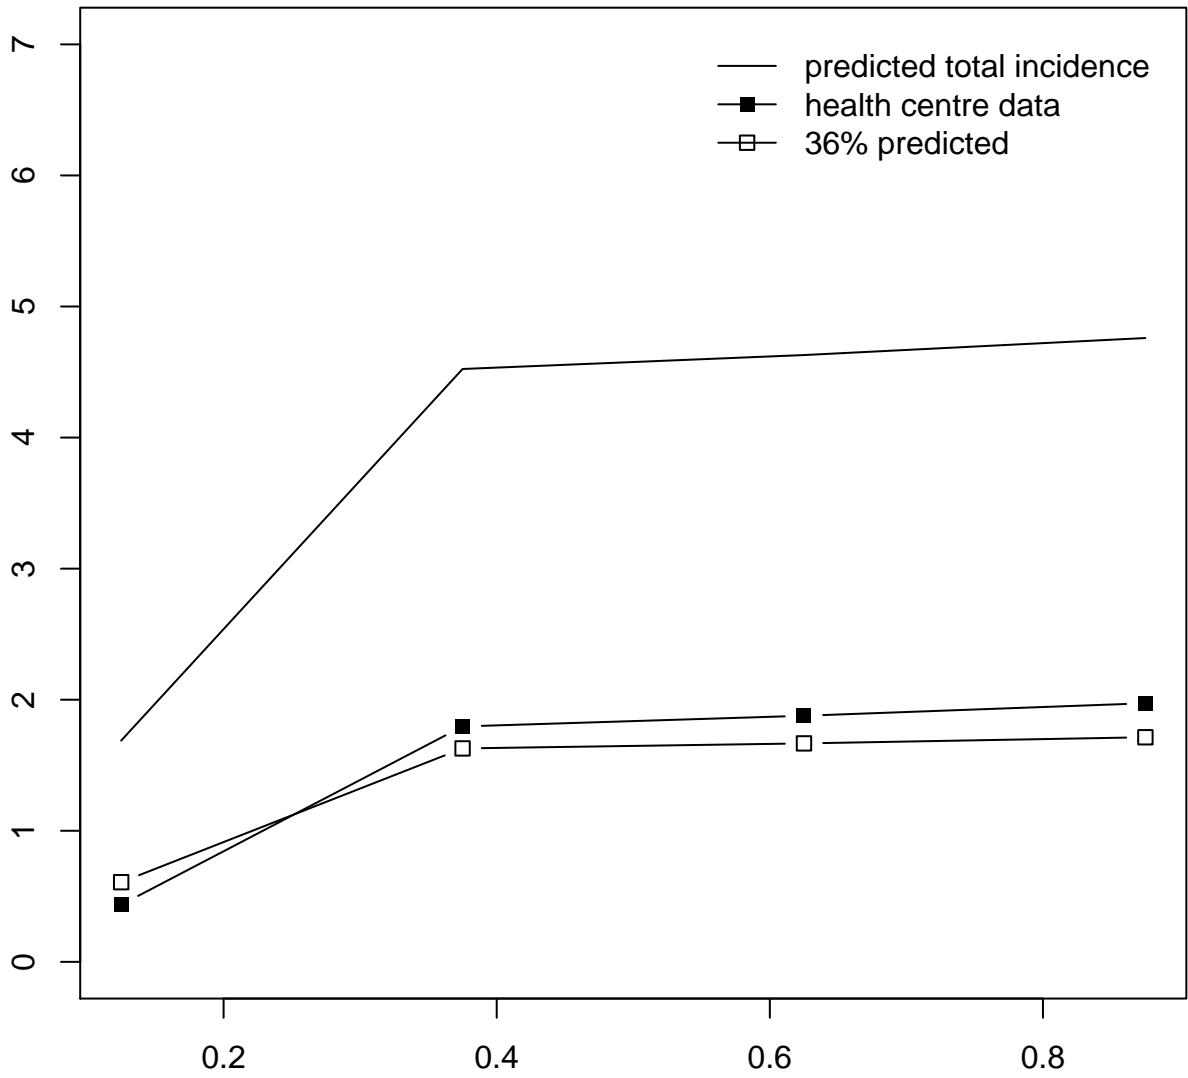

### X5: Age pattern of threshold parasite density for clinical attacks

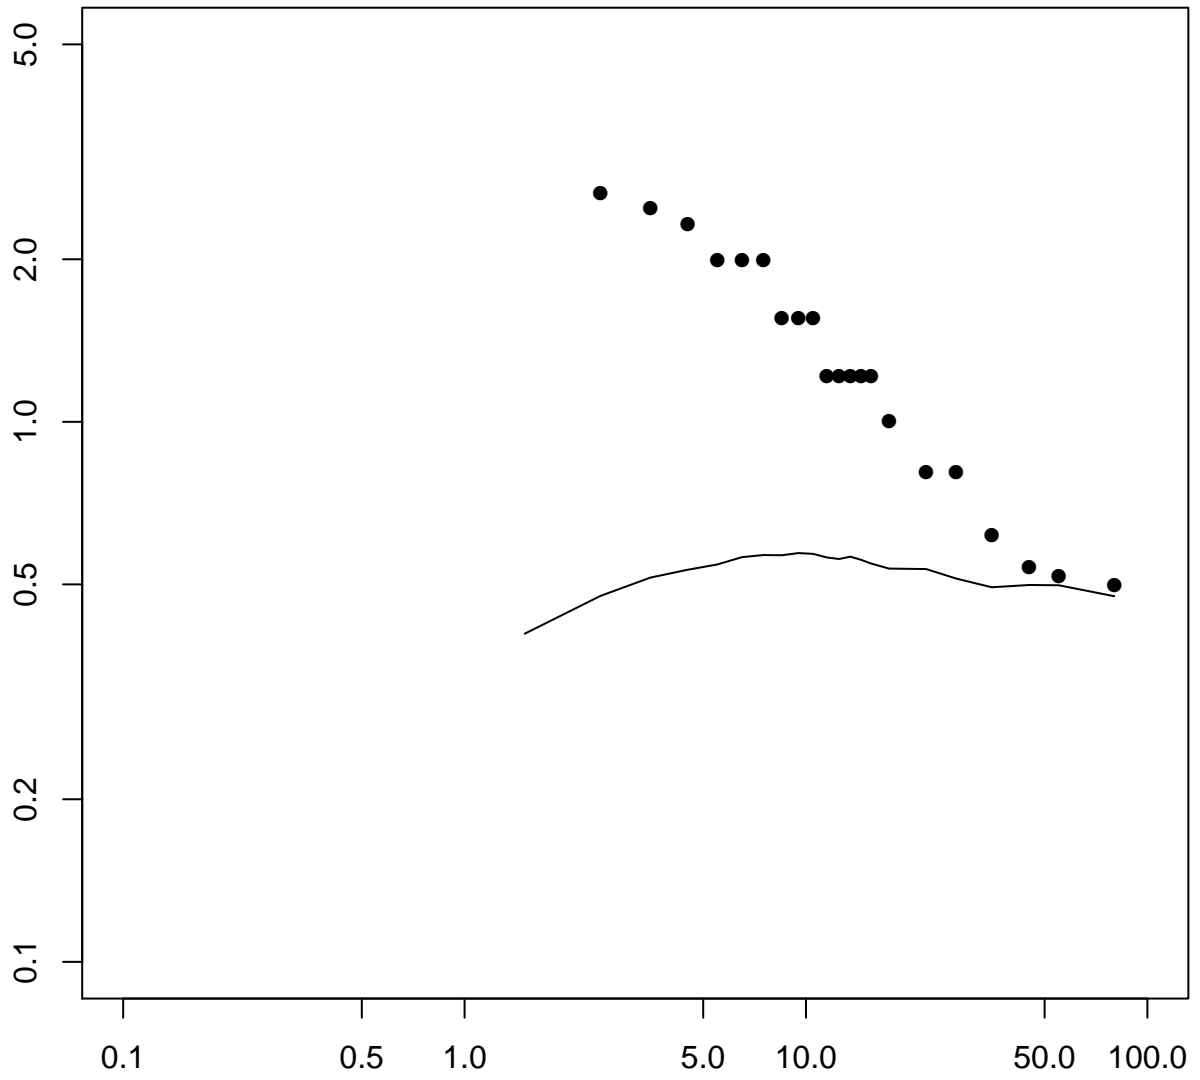

### X6: Hospitalisation rate in relation to prevalence in children

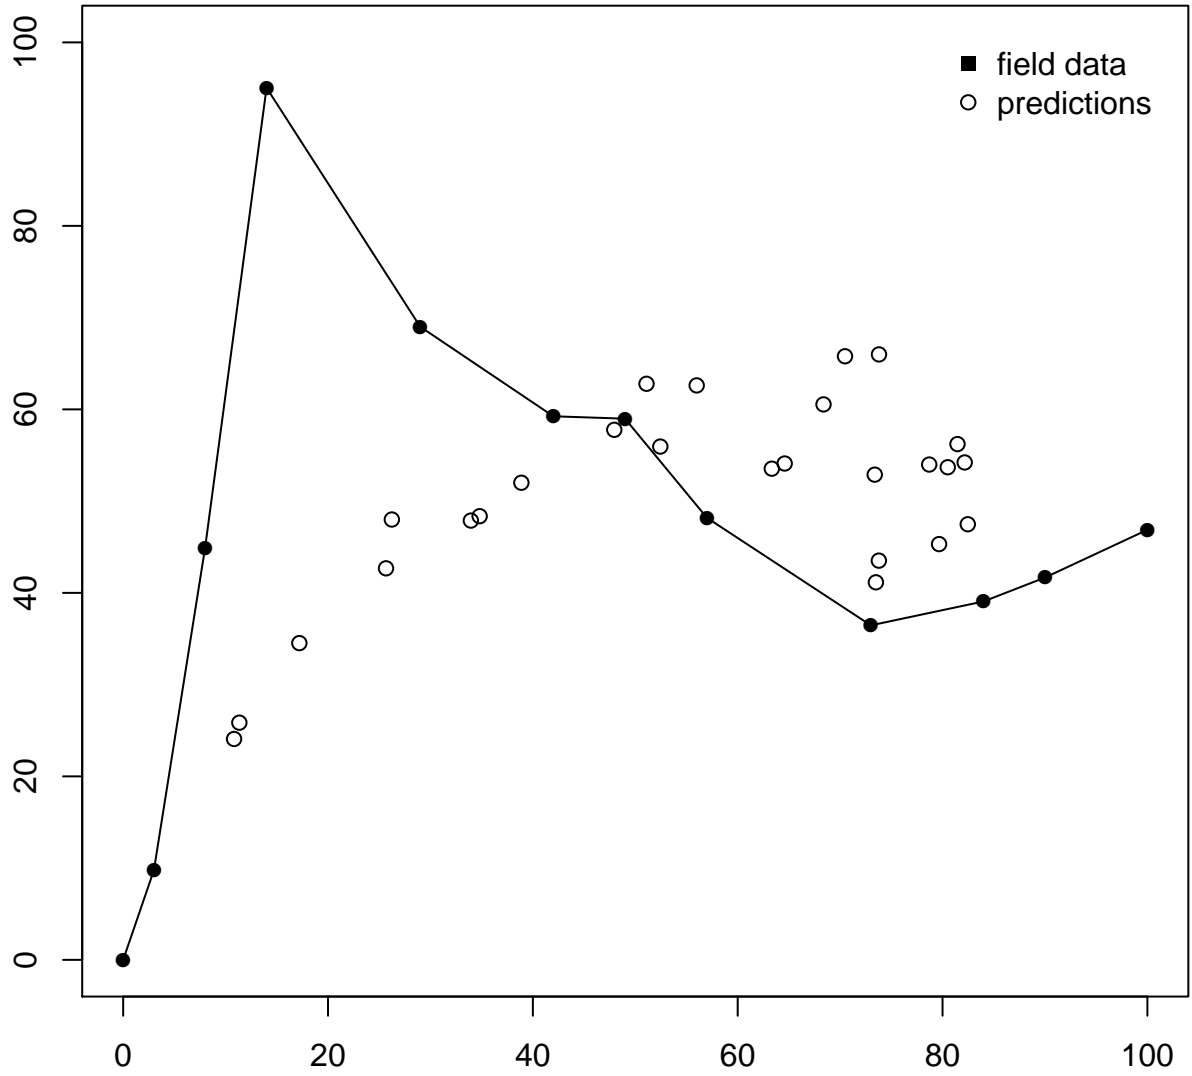

### X7a: Age pattern of hospitalisation

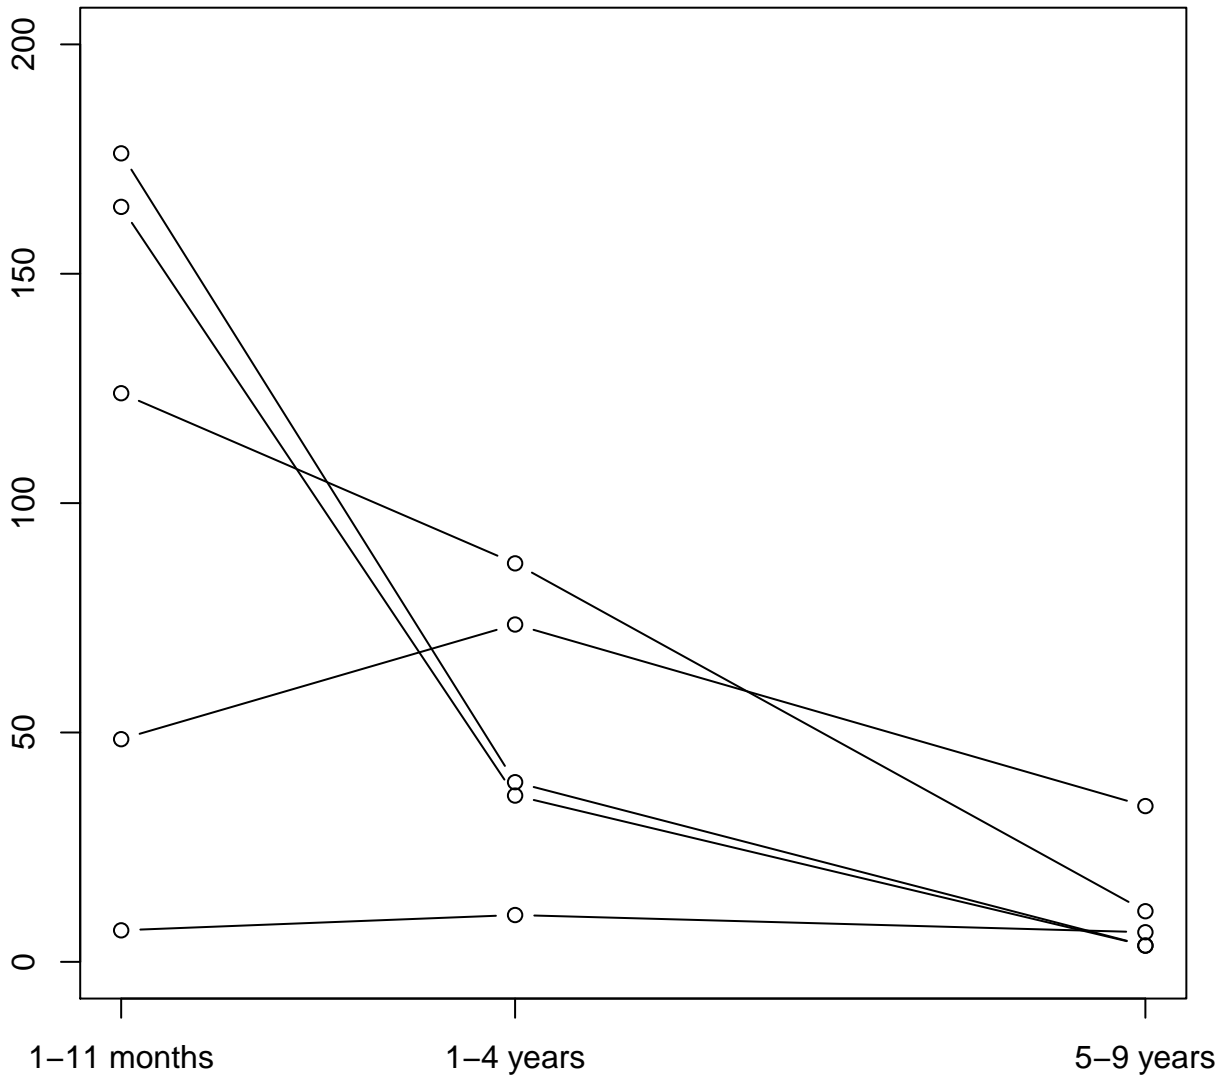



**X7b: Age pattern of hospitalisation**

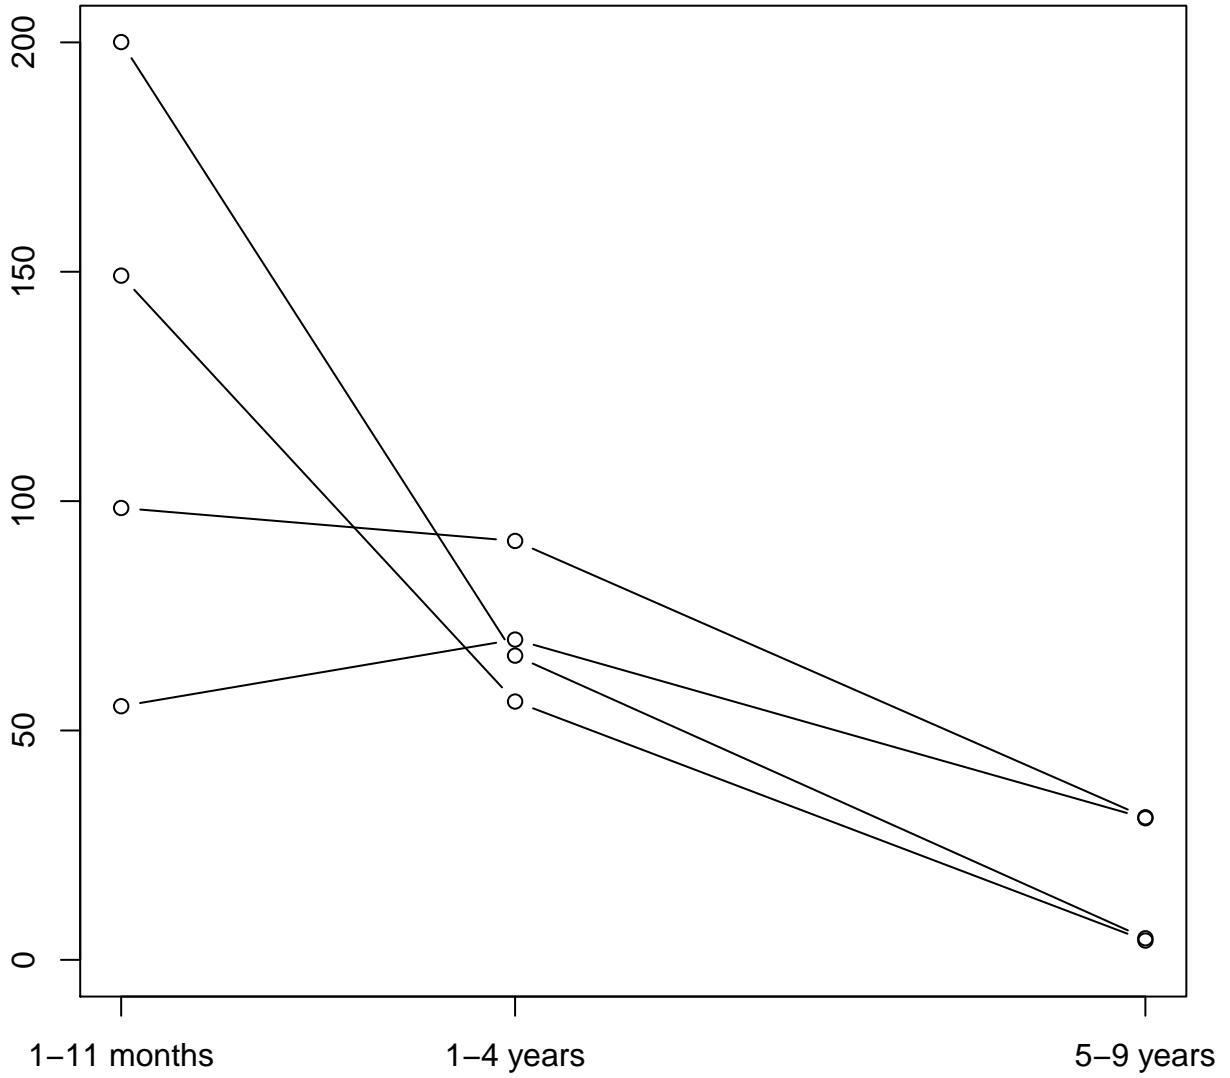

### X8: Malaria specific mortality in children

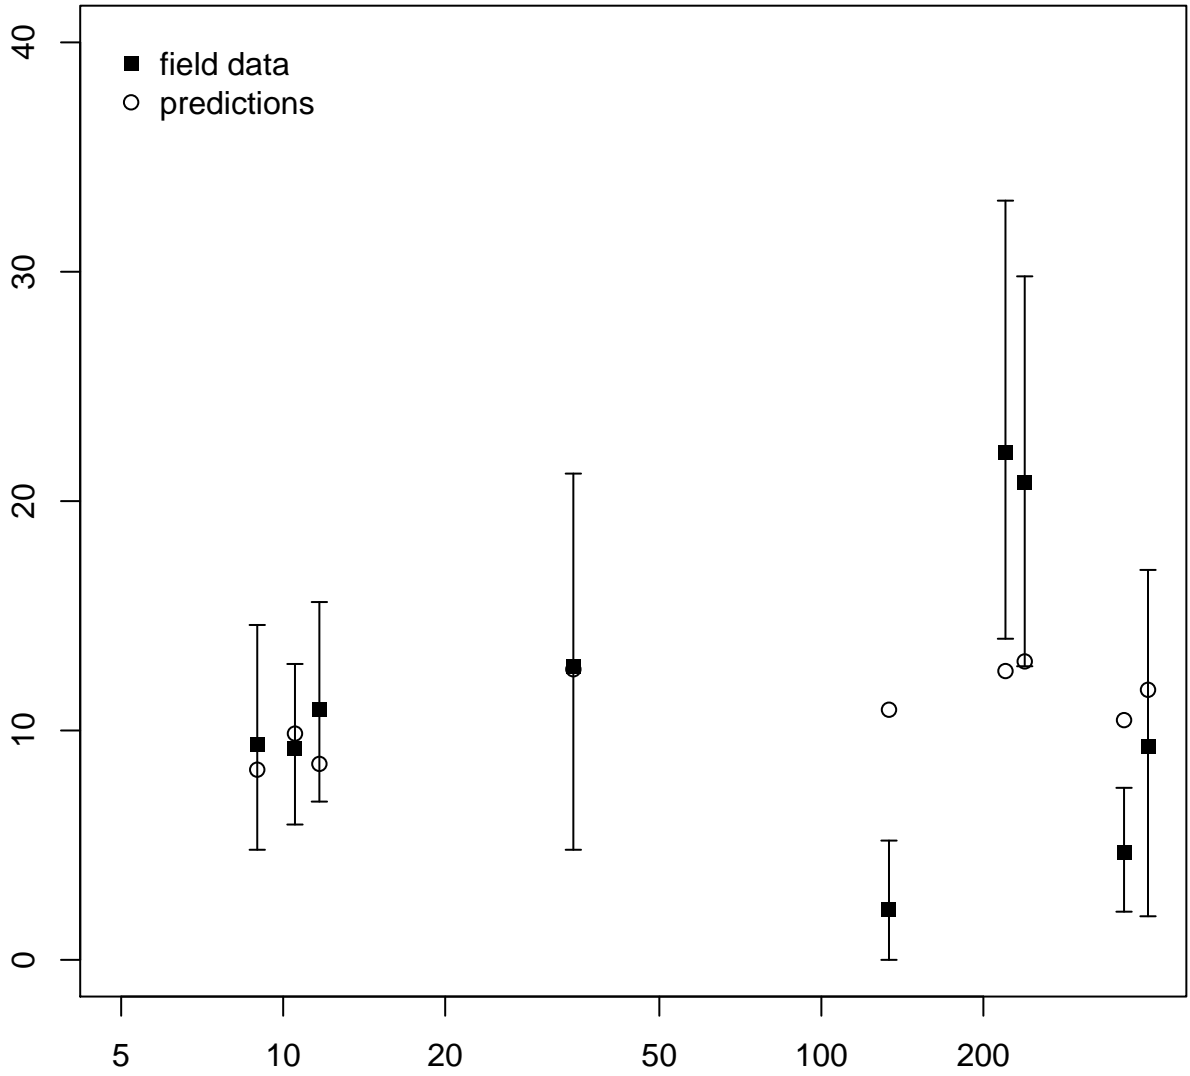

### X9: Infant mortality rate

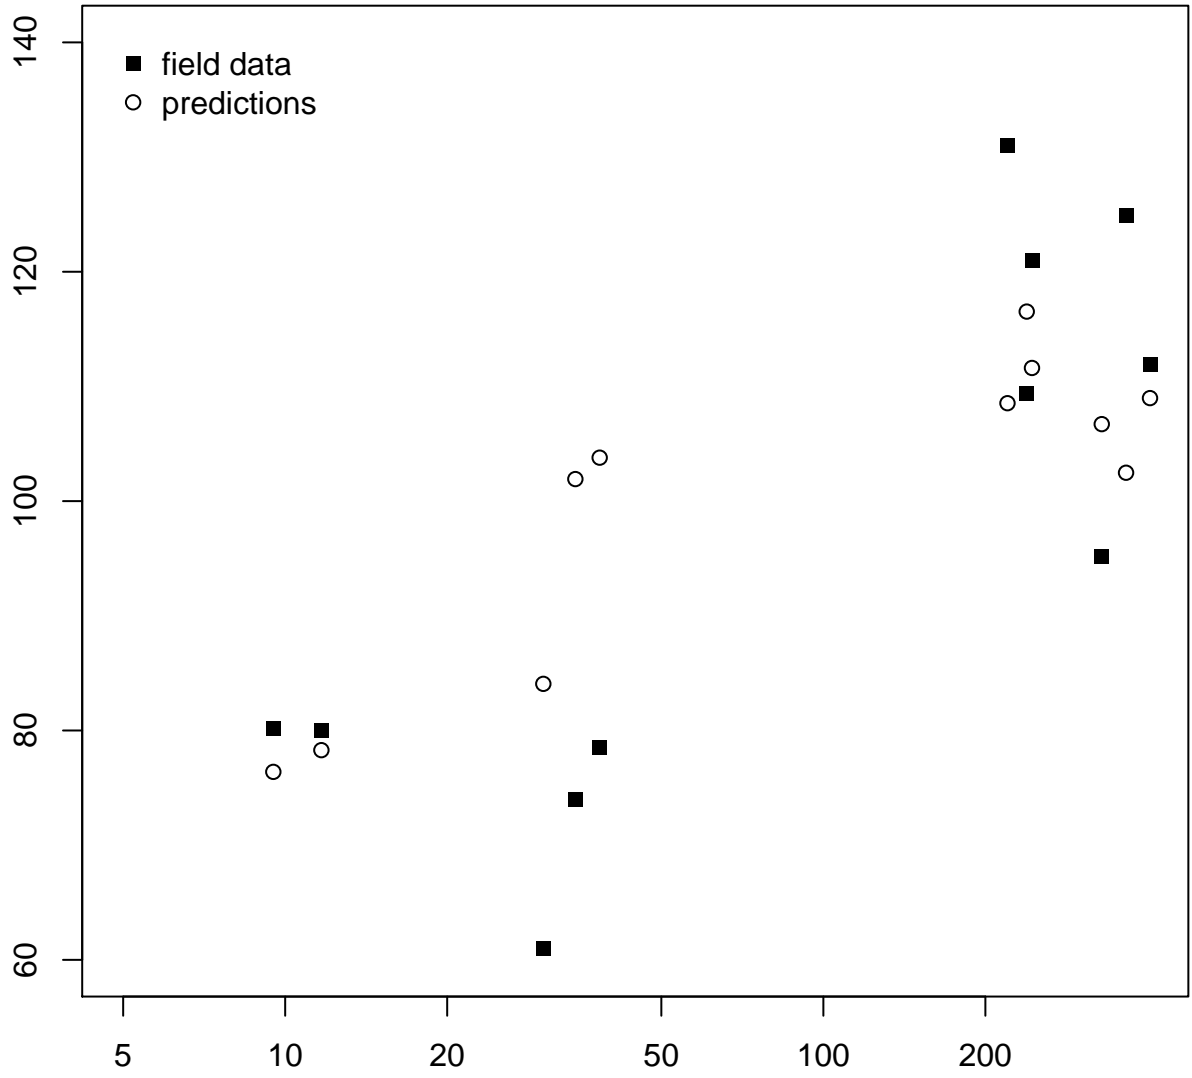

Supplement: pmed.1001157.s022.pdf [file pmed.1001157.s022.pdf]
